# Supplementary material for: Simultaneous pH–rate profiles applied to the two step consecutive sequence A → B → C : a theoretical analysis and experimental verification †
Source: Royal Society of Chemistry journal article supplement (doi:10.1039/a905324g), 2000-01-01
Supplement: a905324g4.doc [file a905324g4.doc]

**Supplementary data**

**Simultaneous pH-rate profiles applied to the two step consecutive sequence A→B→C: a theoretical analysis and experimental verification**

**John Andraos,**a* Edward C. Lathioor*b* and William J. Leigh*b***

*a Department of Chemistry, University of Toronto, Toronto, ON M5S 3H6 Canada*

*b Department of Chemistry, McMaster University, Hamilton, ON L8S 4M1 Canada*

**Table S1d** Resultant Interactions between pH-rate Profile for Base Catalysis with Saturation and other pH-rate Profile Fragments*a*

|  | **Cases** | | |
| --- | --- | --- | --- |
| **Interacting Profiles** | **Crossings** | **Osculating** | **No overlap** |
|  |  |  |  |
|  |  |  |  |

*a* Except , and components.
