# Supplementary material for: Simultaneous pH–rate profiles applied to the two step consecutive sequence A → B → C : a theoretical analysis and experimental verification †
Source: Royal Society of Chemistry journal article supplement (doi:10.1039/a905324g), 2000-01-01
Supplement: a905324g6.doc [file a905324g6.doc]

**Supplementary data**

**Simultaneous pH-rate profiles applied to the two step consecutive sequence A→B→C: a theoretical analysis and experimental verification**

**John Andraos,**a* Edward C. Lathioor*b* and William J. Leigh*b***

*a Department of Chemistry, University of Toronto, Toronto, ON M5S 3H6 Canada*

*b Department of Chemistry, McMaster University, Hamilton, ON L8S 4M1 Canada*

**Table S2** Rate Data for the Hydration of Fluorenylideneketene in Aqueous Perchloric Acid Solution at 25oC*a*

| [HClO4]/ M | k(obs)/ 104 s-1 |
| --- | --- |
| 0.000199 | 6.80, 9.50, 8.33, 9.39, 8.25 |
| 0.0004 | 9.79, 8.80, 10.8 |
| 0.000599 | 8.93, 10.0, 8.75, 9.08 |
| 0.000795 | 10.1, 9.30, 9.54, 8.44 |
| 0.000998 | 8.49, 8.66, 9.84, 9.46 |
| 0.002 | 8.14, 10.9, 6.64, 8.25, 8.55, 9.00 |
| 0.00398 | 8.21, 8.36, 8.50, 7.61, 8.25, 8.13 |
| 0.00596 | 9.72, 9.15 |
| 0.00795 | 8.83, 8.63 |
| 0.00994 | 8.94, 8.87 |
|  | |

*a* Ionic strength = 0.10 M (NaClO4).
