# Supplementary material for: Simultaneous pH–rate profiles applied to the two step consecutive sequence A → B → C : a theoretical analysis and experimental verification †
Source: Royal Society of Chemistry journal article supplement (doi:10.1039/a905324g), 2000-01-01
Supplement: a905324g8.doc [file a905324g8.doc]

**Supplementary data**

**Simultaneous pH-rate profiles applied to the two step consecutive sequence A→B→C: a theoretical analysis and experimental verification**

**John Andraos,**a* Edward C. Lathioor*b* and William J. Leigh*b***

*a Department of Chemistry, University of Toronto, Toronto, ON M5S 3H6 Canada*

*b Department of Chemistry, McMaster University, Hamilton, ON L8S 4M1 Canada*

**Table S4** Calculated Signal Amplitudes as a Function of Perchloric Acid Concentration Using Equation (7)*a*

| [HClO4]/ M |  |
| --- | --- |
| 0.000199 | 0.0339, 0.0300, 0.0334, 0.0292, 0.0326 |
| 0.0004 | 0.0282, 0.0317, 0.0251 |
| 0.000599 | 0.0333, 0.0277, 0.0333, 0.0290 |
| 0.000795 | 0.0236, 0.0238, 0.0241, 0.0322 |
| 0.000998 | 0.0323, 0.0330, 0.0235, 0.0292 |
| 0.002 | 0.00846, 0.0139, 0.00980, 0.0164,  0.0161, 0.0112 |
| 0.00398 | 0.0113, 0.0116, 0.0118, 0.0136, 0.0132, 0.0127 |
| 0.00596 | 0.0150, 0.0146 |
| 0.00795 | 0.0141, 0.0124 |
| 0.00994 | 0.0155, 0.0134 |

*a*
