# Supplementary material for: Simultaneous pH–rate profiles applied to the two step consecutive sequence A → B → C : a theoretical analysis and experimental verification †
Source: Royal Society of Chemistry journal article supplement (doi:10.1039/a905324g), 2000-01-01
Supplement: a905324g9.doc [file a905324g9.doc]

**Supplementary data**

**Simultaneous pH-rate profiles applied to the two step consecutive sequence A→B→C: a theoretical analysis and experimental verification**

**John Andraos,**a* Edward C. Lathioor*b* and William J. Leigh*b***

*a Department of Chemistry, University of Toronto, Toronto, ON M5S 3H6 Canada*

*b Department of Chemistry, McMaster University, Hamilton, ON L8S 4M1 Canada*

**Table S5** Calculated Signal Amplitudes as a Function of Perchloric Acid Concentration Using Equation (8)a

| [HClO4]/ M |  |
| --- | --- |
| 0.000199 | -0.0308, -0.0227, -0.0244, -0.0229, -0.0246 |
| 0.0004 | -0.0235, -0.0277, -0.0194 |
| 0.000599 | -0.0281, -0.0215, -0.0248, -0.0201 |
| 0.000795 | -0.0159, -0.0190, -0.0150, -0.0230 |
| 0.000998 | -0.0233, -0.0240, -0.0175, -0.0248 |
| 0.002 | -0.00220, -0.0102, -0.00135, -0.00651,  -0.00704, -0.00352 |
| 0.00398 | -0.00388, -0.00413, -0.00614, -0.00297,  -0.00327, -0.00309 |
| 0.00596 | -0.00889, -0.00492 |
| 0.00795 | -0.00426, -0.00536 |
| 0.00994 | -0.00469, -0.00616 |

*a*
